# Supplementary material for: Efficient long-range conduction in cable bacteria through nickel protein wires
Source: PubMed Central journal article supplement (PMC8238962; doi:10.1038/s41467-021-24312-4), 2021-06-28
Supplement: 41467_2021_24312_MOESM1_ESM.pdf [file 41467_2021_24312_MOESM1_ESM.pdf]

1 **Supplementary information for**

2 **Efficient long-range conduction in cable bacteria through nickel**  
3 **protein wires**

4 Henricus T. S. Boschker, Perran L.M. Cook, Lubos Polerecky, Raghavendran Thiruvallur  
5 Eachambadi, Helena Lozano, Silvia Hidalgo-Martinez, Dmitry Khalenkow, Valentina  
6 Spampinato, Nathalie Claes, Paromita Kundu, Da Wang, Sara Bals, Karina K. Sand,  
7 Francesca Cavezza, Tom Hauffman, Jesper Tataru Bjerg, Andre G. Skirtach, Kamila Kochan,  
8 Merrilyn McKee, Bayden Wood, Diana Bedolla, Alessandra Gianoncelli, Nicole M.J.  
9 Geerlings, Nani Van Gerven, Han Remaut, Jeanine S. Geelhoed, Ruben Millan-Solsona,  
10 Laura Fumagalli, Lars-Peter Nielsen, Alexis Franquet, Jean V. Manca, Gabriel Gomila, Filip  
11 J. R. Meysman

12  
13 **This file includes:**

14 Supplementary Notes  
15 Supplementary Figures 1 to 16  
16 Supplementary Table 1

17  
18 **Other Supplementary information for this manuscript include the following:**

19 Supplementary Movie 1  
20 Excel files with Supplementary Data 1 and 2

21

## 22 **Supplementary Notes**

23

### 24 **Note 1: Additional results and discussion of the ToF-SIMS analysis**

25           The principal results of the ToF-SIMS analysis are described in the main text. Here we  
26 provide additional experimental results and discussion to support the conclusions drawn in the  
27 main text.

28           *Fragment identification.* In total 71 fragment ions were identified in positive mode and  
29 173 in negative mode in the ToF-SIMS runs of the fiber sheaths. Identification was based on  
30 the exact mass in ToF-SIMS analysis and was checked for identity and purity with the  
31 Orbitrap-SIMS runs. For transition metals and S, the isotopic mass distribution was verified.  
32 For Ni, the four main isotopes ( $^{58}\text{Ni}$ ,  $^{60}\text{Ni}$ ,  $^{61}\text{Ni}$  and  $^{62}\text{Ni}$ ) were found with the expected  
33 isotopic abundance, whereas the minor isotope  $^{64}\text{Ni}$  showed mass interference from a low  
34 amount of Zn. For Cu, both isotopes ( $^{63}\text{Cu}$  and  $^{65}\text{Cu}$ ) showed the expected abundance. For Fe,  
35 the two main Fe isotopes ( $^{54}\text{Fe}$  and  $^{56}\text{Fe}$ ) showed the expected abundance, whereas the minor  
36 Fe isotopes ( $^{57}\text{Fe}$  and  $^{58}\text{Fe}$ ) showed mass interference from an unknown source and Ni  
37 respectively. Zn counts were low and not reliable as the main isotope ( $^{64}\text{Zn}$ ) showed mass  
38 interference from  $^{64}\text{Ni}$ . Other transition metals found in metalloproteins like Mn, Co, Mo and  
39 W were not detected or had very low counts. The main isotopes of Sulfur ( $^{32}\text{S}$  and  $^{34}\text{S}$ ) also  
40 showed the expected abundances, whereas the minor isotopes  $^{33}\text{S}$  and  $^{36}\text{S}$  showed mass  
41 interference from an unknown source. Assignment of the identified fragment ions to  
42 biochemical components of intact cable bacteria and the fiber sheath was based on  
43 literature<sup>14-20</sup> and specific depth profiles (see Supplementary Data 1 and 2, Fig. 1, and  
44 Supplementary Figure 1).

45           *Transition metals.* The ToF-SIMS depth profiles of Ni and Fe are discussed in detail in  
46 the main text. Cu showed a peak at the first data point of the depth profile in both the fiber  
47 sheaths and the intact cable bacteria (Fig. 1D, Supplementary Figure 1A-B, Supplementary  
48 Figure 11), though with a highly variable count number. This surface peak and its variability  
49 between samples was consistent with our LEXRF analysis (Fig. 3), which also showed a  
50 highly variable Cu signal. However, Cu counts from STEM-EDX analysis and the majority of  
51 the ToF-SIMS depth profiles in the fiber sheaths were low compared Ni counts. This suggests  
52 that Cu is not present in high concentrations, but likely derives from an variable impurity that  
53 adsorbs to the sample surface at some stage during sample preparation (either cable bacteria  
54 collection, fiber sheath extraction procedure) or analysis.

55           *Polysaccharide fragments.* As discussed in the main text, the basal polysaccharide  
56 layer (Fig. 1D and 1E) most likely consists of peptidoglycan, which consists of an acidic  
57 amino sugar backbone interconnected by short peptides<sup>21</sup>. We therefore expected to find  
58 fragments that contain both oxygen and nitrogen, as derived from the amino sugar backbone  
59 of peptidoglycan. To verify that we can detect peptidoglycan specific fragments among these  
60 O- and N rich fragments, we performed ToF-SIMS analysis of four protein and  
61 polysaccharide reference samples: Bovine Serum Albumin (BSA), starch, pectin, and  
62 peptidoglycan (Supplementary Figure 8). Although the mass spectra of these reference  
63 samples showed major differences in both negative and positive mode (Supplementary Figure  
64 8), we could not detect any peptidoglycan specific fragments in the fiber sheaths. Moreover,  
65 fragments that contained both nitrogen and oxygen showed either the same depth profile as  
66 amino acid (protein) derived fragments (i.e. an initial peak at the start of the depth profile), or  
67 were specific for nucleic acids that showed low counts and variable depth profiles  
68 (Supplementary Data 1 and 2). The latter suggests that some residual DNA/RNA remains  
69 associated with the fiber sheaths after extraction. The lack of peptidoglycan specific

70 fragments is most likely due to the abundance of protein in the fiber sheath, which leads to  
71 high signals of amino acid derived fragments that mask fragments derived from  
72 peptidoglycan. Further work is needed to confirm that the polysaccharide layer is indeed  
73 made of peptidoglycan.

74 *P-containing fragments.* The fiber sheaths also showed high counts of various P-  
75 containing fragment ions in both positive and negative mode (Supplementary Data 1 and 2)  
76 with variable depth profiles between runs. The likely source of these P-containing ions is the  
77 poly-phosphate granules that are commonly found in cable bacteria<sup>22</sup>. Likely, the poly-  
78 phosphate granules are incompletely removed during the fiber sheath extraction procedure,  
79 and they comprise the particles that are seen in the interior of fiber sheaths during STEM 3D-  
80 tomography (Fig. 1A).

81 *S and Ni containing fragments in negative mode.* Negative mode ToF-SIMS depth  
82 profiles showed a subsurface peak of various S-derived anions ( $^{32}\text{S}^-$ ,  $^{34}\text{S}^-$ ,  $\text{SH}^-$  and  $\text{S}_2^-$ ) at  
83 approximately the same position as the Ni peak in positive mode (Fig. 1D and 1E,  
84 Supplementary Figure 1, Supplementary Data 2). In addition, a substantial number of Ni-  
85 containing fragments were found in negative mode that also showed this distinct subsurface  
86 peak (Fig. 1D, Supplementary Figure 1, Supplementary Data 2). The most prominent Ni  
87 containing fragments were a series of  $\text{Ni}_x\text{S}_y^-$  cluster ions ( $x = 1$  to  $6$ ,  $y = x \pm 1$ , both  $^{58}\text{Ni}$  and  
88  $^{60}\text{Ni}$  isotopologues were detected, Supplementary Figure 9). Additionally, we found  $\text{NiC}_x\text{N}_x^-$   
89 ( $x = 1$  or  $2$ ) and  $\text{NiCSN}^-$ , and even a small but detectable  $\text{Ni}^-$  signal (Supplementary Data 2).  
90 All these Ni-containing fragments showed a similar sharp subsurface peak in the depth profile  
91 as found for Ni in positive mode (Fig. 1E). The observed NiS clusters are most likely formed  
92 in the ion plume of the ToF-SIMS rather than being natively present in the fiber sheath<sup>23–25</sup>.  
93 As a control, we analyzed an artificial mixture of protein (BSA) and freshly precipitated  
94 mineral NiS, and we indeed observed the same  $\text{Ni}_x\text{S}_y^-$  cluster ions (Supplementary Figure

95 9D). Still, due to an effect called self-focusing<sup>23</sup>, the detection of NiS clusters suggests that Ni  
96 and S must be present in close proximity in the fiber sheath (lateral (XY) within <0.5 nm,  
97 depth (Z) within <2 nm), otherwise they would not be formed in the ToF-SIMS ion plume.  
98 This observation is hence in agreement with the presence of a S-ligated Ni cofactor in the  
99 fiber sheaths.

100 We also found a number of organic S fragments in negative mode ToF-SIMS spectra  
101 (Fig. 1E, Supplementary Figure 1, Supplementary Data 2). Most of these fragments showed a  
102 similar depth profile as S<sup>-</sup> with a sharp subsurface peak on top of a general S signal, and so  
103 again, we cannot exclude that they were formed during ToF-SIMS analysis. However, two  
104 fragments (C<sub>2</sub>S<sub>2</sub><sup>-</sup> and C<sub>2</sub>S<sub>2</sub>H<sup>-</sup>) showed specific depth profiles, with the subsurface peak much  
105 more pronounced than for S<sup>-</sup> (Fig. 1E). This suggests that these two fragments originate  
106 directly from the fiber sheath. These fragments could indicate that the fiber proteins are rich  
107 in disulfide bridges (C-S-S-C) or they could be derived from the Ni/S group. Fiber sheaths  
108 display an exceptional chemical resistance, as they remain their integrity and conductivity  
109 after SDS and EDTA treatments, and this resistance could be aided by protein disulfide  
110 bridges.

111 *Sputtering depth calibration.* Sputtering depth was calibrated by *in-situ* AFM height  
112 measurements at three different times (Supplementary Figure 2): before sputtering, just after  
113 the Ni or S peak appeared, and finally just after the carbohydrate peak appeared. Sputtering  
114 depth was approximately linear with sputtering time, although the initial protein layer seemed  
115 to sputter somewhat faster (Supplementary Figure 2). A representative example of the  
116 resulting AFM height maps is shown in Supplementary Figure 10, where sputtering was  
117 stopped at 57 sec (i.e. just after the Ni peak had emerged). There was considerable lateral  
118 variation in sputtering depths for a given sputtering time as seen in transects across the central  
119 cell area (Supplementary Figure 10D) and at the cell junctions (Supplementary Figure 10C).

120 As the junctions are higher than the cell areas (e.g. Supplementary Figure 10A), the shading  
121 in sputtering seen at the cell junctions probably due the angled Ar-cluster sputter beam hitting  
122 the side of the cell junction facing the beam at a higher angle whereas the opposite side is hit  
123 much less. This lateral variation in sputtering rate together with the left-over cytoplasm  
124 content and the presence of the cart-wheel structure at the junctions leads to smearing of the  
125 ToF-SIMS depth profiles. This explains why only the first fiber sheath layer is clearly seen in  
126 the ToF-SIMS depth profiles.

127

## 128 **Note 2: Additional results and discussion of the SDM analysis**

129 The key results of the Scanning Dielectric Microscopy (SDM) analysis are described in the  
130 main text. Here we describe additional results that strengthen the conclusions obtained. The  
131 finite element model we used is the same as presented earlier<sup>5-7</sup> except that here, fibers have a  
132 core-shell structure with a conductive core and an insulating outer shell. The whole simulation  
133 domain (which encompasses the ellipsoid fiber and the surrounding space) is cylindrical with  
134 height 34  $\mu\text{m}$  and radius 17  $\mu\text{m}$ . Insulating boundary conditions are assumed on the lateral  
135 and top borders of the simulation domain. A cross-section of the electric potential distribution  
136 obtained from the model calculations is shown in the right insert in Fig. 5C. At the frequency  
137 of the calculations (2 kHz) and for the parameters in Fig. 5, the electric potential is real, and  
138 hence, the phase of the electric potential is constant in space. The length of the fiber in the  
139 model is  $L = 1 \mu\text{m}$ . It has been shown previously that for  $L > 100 \text{ nm}$  the force acting on the tip  
140 is independent from the fiber length<sup>6</sup>.

141         Supplementary Figure 12A shows experimentally derived capacitance gradient cross-  
142 section profiles corresponding to SDM images (similar to the one shown in the left insert in  
143 Fig. 5B of the main text) acquired at different tip-substrate distances (continuous lines,

144 ranging from  $z=60$  nm to  $z=240$  nm). The profile at  $z=66$  nm is shown in Fig. 5C of the main  
145 text. The dashed lines represent the result of the theoretical calculations with the model  
146 described above for the same fiber parameters as those use in Fig. 5 of the main text ( $h=42$   
147 nm,  $w=87$  nm,  $d=12$  nm,  $\epsilon_s = \epsilon_c=3$ ,  $\sigma_s=0$  S/cm,  $\sigma_c=20$  S/cm). The tip-substrate distances have  
148 been determined from a capacitance gradient approach curve measured on a bare part of the  
149 substrate (Supplementary Figure 12B, symbols) following procedures previously reported<sup>5</sup>.  
150 The calculated capacitance gradient profiles nicely reproduce the experimental ones with no  
151 adjustable parameter. At all distances, the theoretical (and experimental) electric force phase  
152 contrast is zero (not shown). Similar conclusions are reached if we analyze the capacitance  
153 gradient approach curves measured on the substrate and on the fiber (pink and black thick  
154 lines in Supplementary Figure 12B). A least square fitting of the model curves to the  
155 experimental curve for  $\epsilon_s = \epsilon_c=3$  and  $\sigma_s=0$  S/cm,  $\sigma_c=20$  S/cm gave  $d=12\pm 2$  nm (red continuous  
156 line in Supplementary Figure 12B), in agreement with the value obtained from the  
157 capacitance gradient cross-section profile analysis. The sensitivity of the capacitance gradient  
158 profiles on the thickness of the insulating shell is shown by the dashed lines in Supplementary  
159 Figure 12B for the approach curves and in Supplementary Figure 12C for the profiles at  $z=66$   
160 nm. In these figures we also compare the predictions corresponding to an homogeneous  
161 conductive model, corresponding to  $d=0$  nm (or to  $\sigma_s = \sigma_c=20$  S/cm, dark grey line), and to an  
162 homogeneous insulating model, corresponding to  $d=h/2$  (or  $\sigma_c=0$  S/m, light grey line). In all  
163 cases we assumed a protein composition of all layers,  $\epsilon_s = \epsilon_c=3$ . The pure conductive model  
164 overestimates the force acting on the tip, while the pure insulating model underestimates it.

165 We have considered other possible sets of electric parameters for the fiber to explore  
166 alternative interpretations of the SDM results. Figs. S13A and S13B show, respectively, the  
167 contrast values of the amplitude (in zF/nm) and phase of the electrical force for the tip at the  
168 center of the fiber at a distance  $z=66$  nm from the substrate as a function of the conductivity

169 of the core in the range from  $\sigma_c = 10^{-9}$  S/m (insulator) to  $10^3$  S/m (conductor). The dielectric  
170 constants have been fixed to  $\epsilon_s = \epsilon_c = 3$  (proteins). The thickness of the insulating layer has been  
171 varied from  $d = 0$  nm to  $d = 20$  nm. The calculations were done for the frequency of the  
172 experiments (2 kHz). The amplitude as a function of the core conductivity displays two  
173 plateaus for low and high conductivities, separated by a transition region, which tends to show  
174 a third plateau not fully displayed. The phase shows a minimum for every transition region  
175 mentioned above. Such behavior is characteristic of materials with (equivalent) permittivities  
176 showing real (dielectric) and imaginary (conductive) parts. An analytical expression for the  
177 equivalent homogeneous permittivity of the core-shell cylinder in a non-uniform electric field  
178 cannot be derived, but the behavior observed is qualitatively similar to the one corresponding  
179 to a core-shell spherical particle in a uniform electric field<sup>26</sup>. For a given measured  
180 capacitance gradient contrast (grey band in Supplementary Figure 13A), one can obtain  
181 couples of values for the shell thicknesses and core conductivity that match<sup>5,27</sup>. For instance,  
182 we observe that the solution found above for the shell thickness ( $d = 12$  nm) is valid for  $\sigma_c > 10^{-2}$   
183 S/m (and, in particular, for  $\sigma_c = 2 \cdot 10^3$  S/m as employed here). Other couples of values are for  
184 instance  $d = 5$  nm and  $\sigma_c = 5 \cdot 10^{-6}$  S/cm or  $d = 0$  nm,  $\sigma_c = 7 \cdot 10^{-7}$  S/cm, among others. For these  
185 values the same capacitance gradient profile (matching the experimental one) is obtained, as  
186 shown in the Supplementary Figure 13C. However, the different couples of values predict  
187 different electrical phase contrast profiles (see Supplementary Figure 13D). Only the couple  
188 of values corresponding to the solution reported in the main text ( $d = 12$  nm and  $\sigma_c > 10^{-2}$  S/m)  
189 predicts a null phase contrast, as seen in the experimental results.

190 We have also considered a homogeneous dielectric model, with no conductivity, and  
191 analyzed the (equivalent) homogeneous dielectric constant that the fiber should have to  
192 explain the experimental results. A least square fitting of the calculated capacitance gradient  
193 approach curves for different dielectric constants to the experimental curve measured on the



194 fiber gives  $\epsilon_s = \epsilon_c = 11 \pm 3$  (see Supplementary Figure 14A). For this equivalent dielectric  
195 constant value the constant height capacitance gradient profiles at the different tip substrate  
196 distances adequately reproduce the experimental ones (Supplementary Figure 14B). The  
197 phase contrast for this model is zero (not shown). However, a problem is that the equivalent  
198 dielectric constant value found ( $\epsilon_s = \epsilon_c = 11 \pm 3$ ) is much larger than values obtained, with the  
199 same technique, on other (dry) bio-samples made of lipids ( $\epsilon=2$ )<sup>28</sup>, proteins ( $\epsilon=3-5$ )<sup>27,28,6,7</sup> and  
200 even nucleic acids ( $\epsilon \sim 8.5$ )<sup>5,27</sup> (see Supplementary Figure 14C). Our composition data all  
201 suggest that the fibers are made primarily of protein. During ToF-SIMS analysis of fiber  
202 sheaths, some fragments derived from residual RNA or DNA were detected, but these were  
203 not associated with the initial fiber protein layer (see Additional results and discussion of the  
204 ToF-SIMS analysis) and it therefore seems unlikely that an isolated fiber as analyzed here by  
205 SDM would contain major amounts of DNA. For this reason, the pure dielectric model is  
206 discarded in favor of the conductive core-shell model.

207 We have also analyzed the homogeneity of the fiber electrical properties along its  
208 longitudinal direction in view of the slight variations of the electric contrast observed in the  
209 SDM images along the fiber (see left insert in Fig. 5C of the main text). To this end we  
210 considered the core-shell geometrical model that accounts for the observed (tiny) height  
211 variations of the fiber height ( $\pm 5$  nm)<sup>29</sup> shown in Supplementary Figure 15A. Examples of  
212 calculated longitudinal and transversal electric potential distributions are shown in figs. S15B  
213 and S15C, respectively. The tip and electrical parameters of the fiber are the same as those  
214 used in the calculations of in Fig. 5 of the main text, except for the shell thickness, which here  
215 is  $d=10 \pm 2$  nm. The slightly smaller value obtained, as compared to  $d=12 \pm 2$  nm for the  
216 cylindrical model, is due to the tip convolution effects included in this geometrical model (see  
217 Supplementary Figure 15D), as discussed elsewhere<sup>29</sup>. Supplementary Figure 15E shows a  
218 calculated constant height SDM image at  $z=66$  nm corresponding to the region enclosed by

219 the dashed rectangle in the insert (which corresponds to the image in the left insert in Fig. 5C  
220 of the main text). The calculated SDM image is nearly identical to the experimental one, a  
221 fact that is further evidenced by comparing the capacitance gradient cross-section profiles  
222 calculated on the hills and valleys of the image with the experimental ones (figs. S15F and  
223 S15G, respectively). This result shows that, to a good approximation, the electrical properties  
224 of the fiber are homogeneous along its length.

225 Finally, we have also analyzed the electric properties of the fibers when they are still  
226 embedded within the fiber sheath by SDM. Supplementary Figure 16A shows an AFM  
227 topographic image of a fiber sheath. Figs. S16B and S16C show, respectively, topographic  
228 and constant height SDM images acquired in the area enclosed by the dashed rectangle in  
229 Supplementary Figure 16A. The corresponding height and capacitance gradient profiles along  
230 the dashed lines in figs. S16B and S16C are shown in figs. S16D and S16E, respectively  
231 (black lines). The geometry of the tip has been calibrated with a capacitance gradient  
232 approach curve acquired on the substrate (not shown) giving  $R=26\pm 2$  nm,  $\theta=22\pm 3^\circ$ ,  
233  $C'_{\text{offset}}=109\pm 3$  zF/nm. The sample geometry has been reconstructed by using a topographic  
234 reconstruction procedure<sup>29</sup>, as above (see Supplementary Figure 16D). For simplicity, we  
235 have considered an equivalent homogeneous dielectric model characterized by an (equivalent)  
236 dielectric constant  $\epsilon_{\text{sheath}}$ . An example of a calculated electric potential distribution is shown in  
237 Supplementary Figure 16F for a tip-substrate distance  $z=155$  nm and  $\epsilon_{\text{sheath}}=7$ . Supplementary  
238 Figure 16E shows calculated constant height capacitance gradient profiles along the dashed  
239 line in Supplementary Figure 16C for different values of  $\epsilon_{\text{sheath}}$  (thin lines). The experimental  
240 values on the hills (corresponding most likely to fiber positions) agree with the calculated  
241 ones for  $\epsilon_{\text{sheath}}\sim 7-11$  (except the first hill that gives a somewhat larger value). These values  
242 are in reasonable agreement with those found for the isolated fiber when the equivalent  
243 dielectric model is considered  $\epsilon\sim 11\pm 3$ . This result implies that the electrical properties

244 obtained for the fibers when within the fiber sheath are consistent with those obtained on  
245 isolated fibers. Similar results are expected for a fiber sheath model that included its internal  
246 structure, composition and electrical properties (e.g. conductive core-shell model for the  
247 fibers), as the one sketched in Fig. 5A of the main text. However, obtaining quantitative  
248 predictions from SDM measurements for such complex model involving buried structures lies  
249 outside the current capabilities of SDM<sup>30</sup> since too many unknowns are present in the model  
250 (e.g. fiber position within the fiber sheath, number of fibers present within the polysaccharide  
251 layer, thickness of the polysaccharide layer, etc.).

252

253 **Note 3: Calculations for estimating the contribution of the fibers to the fibers sheath, the**  
254 **distance between Ni atoms in the conductive fibers and electron tunneling times.**

255 Electron hopping rates between redox sites in metalloproteins decreases logarithmic  
256 with the distance between the redox sites<sup>31</sup>. Given the relatively low Ni content of the fiber  
257 sheaths of 0.017 and 0.034 Atm% as determined by STEM-EDX for two sample batches  
258 (Supplementary Table 1), we tried to estimate what the inter atomic distance of the Ni atoms  
259 would be. At the cell area thick fiber sheaths are ca. 4  $\mu\text{m}$  wide and 117 nm high (this study)  
260 and contain on average 60 parallel fibers<sup>2</sup> that each contain a conductive core of 26 nm  
261 diameter (this study). From this we calculate that the conductive fiber cores explain only 7%  
262 of the cross-section area of the fiber sheath. If we do the same calculations for the total 50 nm  
263 fiber with that includes the non-conductive outer shell, we arrive at a 25% contribution from  
264 the fibers to the fiber sheath. Assuming that the conductive fiber core is made of protein with  
265 a density of  $1.4 \text{ g}\cdot\text{cm}^{-3}$  (density from<sup>32</sup>) and that Ni is concentrated in the conductive core (this  
266 study), we estimate that the Ni concentration in the conductive fiber core is between 0.24 and  
267  $0.54 \text{ Atm}\%$  or 260 and  $580 \mu\text{Mol}\cdot\text{cm}^{-3}$ , which are substantial concentrations. Further

268 assuming that Ni is homogenously distributed in the core of the fibers, this Ni concentration  
269 in the fiber core leads to an interatomic Ni distance of 1.4 – 1.9 nm, which is within the range  
270 as found for metalloproteins involved in electron transfer<sup>31</sup>.

271 We then used these estimates of interatomic Ni distances to calculate electron  
272 tunneling times needed to support the high average normalized currents in fiber sheaths of 28  
273 nA (calculated from the standard SDS+EDTA extraction data in Fig. 4D). Estimated  
274 tunneling times are 50 – 90 nsec, which is possible but on average however approximately a  
275 factor 10 faster than expected for metalloproteins with similar hopping distances<sup>31</sup>. It seems  
276 therefore unlikely that long distance electron redox hopping through the Ni/S-group can on its  
277 own support the high conductivity of the fibers in cable bacteria (see Discussion in the main  
278 text).

279

280

281 **Supplementary figures and tables**

282

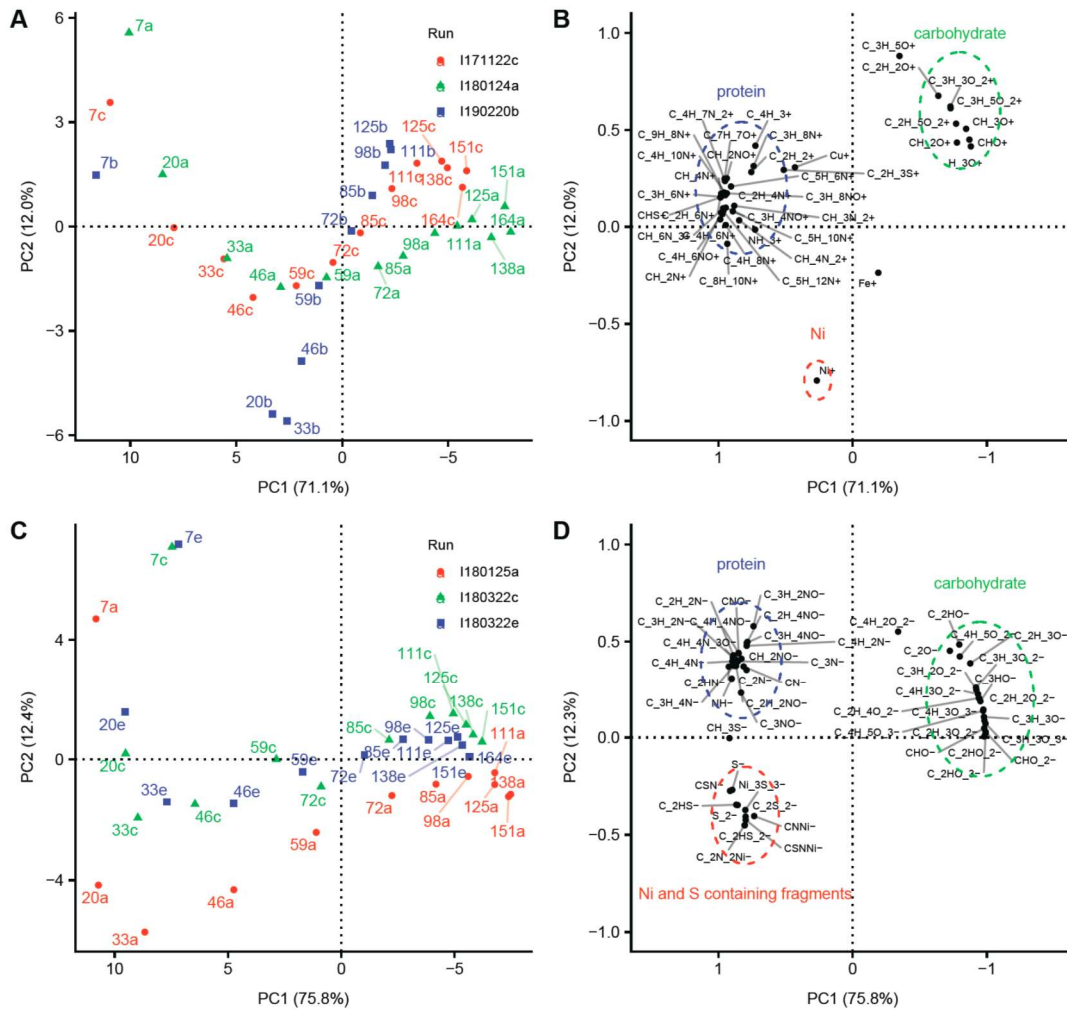

283

284 **Supplementary Figure 1.** Principal Component Analysis (PCA) of ToF-SIMS depth profiles  
 285 for a selection of ion fragments recorded from fiber sheaths of cable bacteria. ToF-SIMS data  
 286 were collected in both positive (A, B) and negative modes (C, D), and the results of three  
 287 replicate depth profiling runs are shown. Counts for fragments were normalized and centered.  
 288 Panels (A, C) show the scores plot (labels indicate sputtering time in seconds; colors denote  
 289 separate runs). Panels (B, D) show the loading plots of the fragments. Only the data until the  
 290 peak carbohydrate-derived fragments at 125-164 seconds of sputtering time were retained  
 291 (representing the first half of the double-folded fiber sheath).

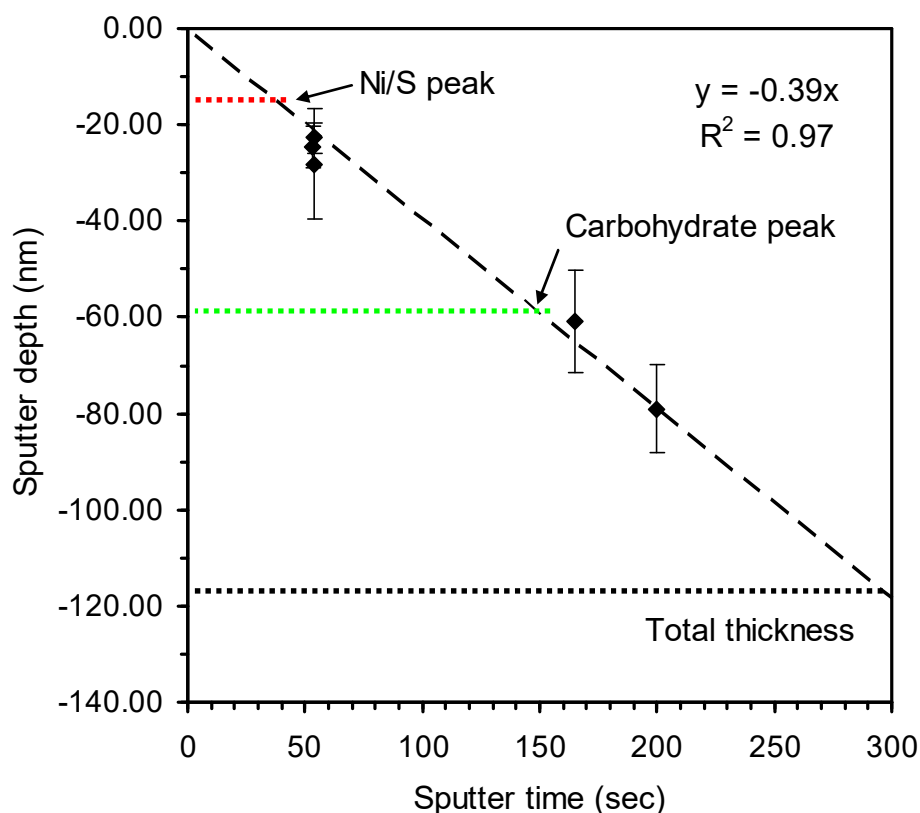

292

293 **Supplementary Figure 2.** Calibration of sputtering depth as a function of sputter time during  
 294 ToF-SIMS analysis. The in-situ AFM within the ToF-SIMS instrument was used to record  
 295 height images at three different times (start (sputter time = 0 sec), just after the Ni or S peak  
 296 (ca. 50 sec) and just after the carbohydrate peak (ca. 160 and 190 sec)). Sputtering depth  
 297 (black diamonds, average +/- SD) showed a linear relation with sputtering time (dashed line =  
 298 regression line through origin), though the initial protein layer seemed to sputter somewhat  
 299 faster. The total thickness of the double-folded fiber sheath amounts to  $117 \pm 10$  nm  
 300 (determined within the middle of cells at  $t = 0$  sec; black dotted line) and is well in agreement  
 301 with previous independent AFM imaging<sup>2</sup>. The average position of the Ni/S peak ( $15 \pm 3$  nm)  
 302 and the carbohydrate peak ( $59 \pm 6$  nm) are indicated (red and green dotted lines respectively,  
 303  $N = 6$  from 3 positive and 3 negative depth profiles in Supplementary Figure 1).

304

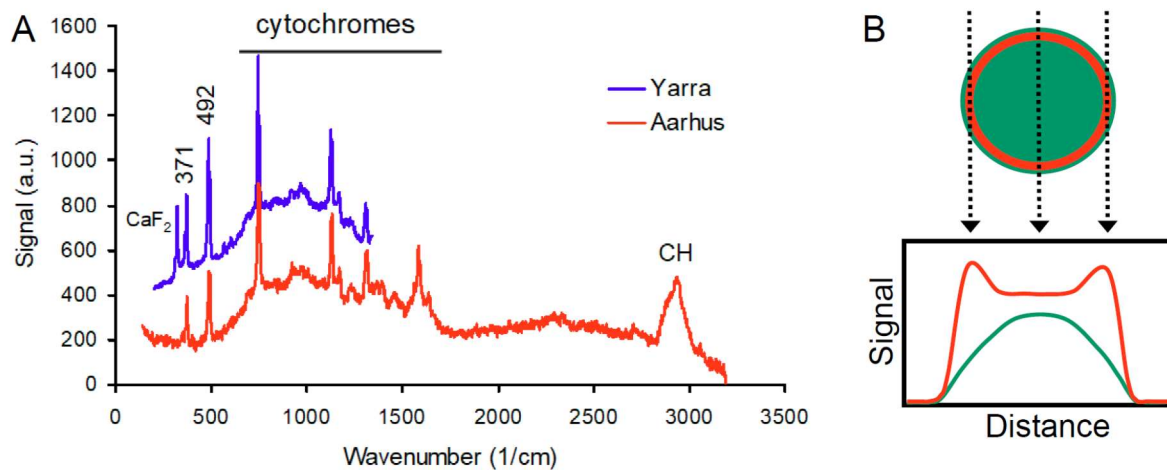

305

306 **Supplementary Figure 3.** (A) Green-laser Raman spectra of intact cable bacteria from  
 307 additional sediments also show the characteristic low-frequency bands at 371 and 492  $\text{cm}^{-1}$ .  
 308 Spectra are from ca. 1  $\mu\text{m}$  wide freshwater cable bacteria (Aarhus pond sediment, intact living  
 309 filaments in glass micro-chambers, average background-corrected spectrum) and ca. 1  $\mu\text{m}$   
 310 wide brackish cable bacteria (Yarra River sediment, intact filaments air-dried on a  $\text{CaF}_2$   
 311 cover, average raw spectrum). (B) Interpretation of the Raman signal distribution in the scan  
 312 across an individual cable bacterium in Fig. 2B. General components of a bacterial cell such  
 313 as proteins and CH are more-or-less evenly distributed in the cross section (green filled  
 314 circle), whereas the Ni/S group is only found in the periplasmic space (red open circle). In the  
 315 depth integrated Raman signals, this leads to a unimodal distribution for Raman bands from  
 316 the general components and a bimodal distribution for the two low frequency Ni/S bands with  
 317 a peak at both edges of the filament.

318

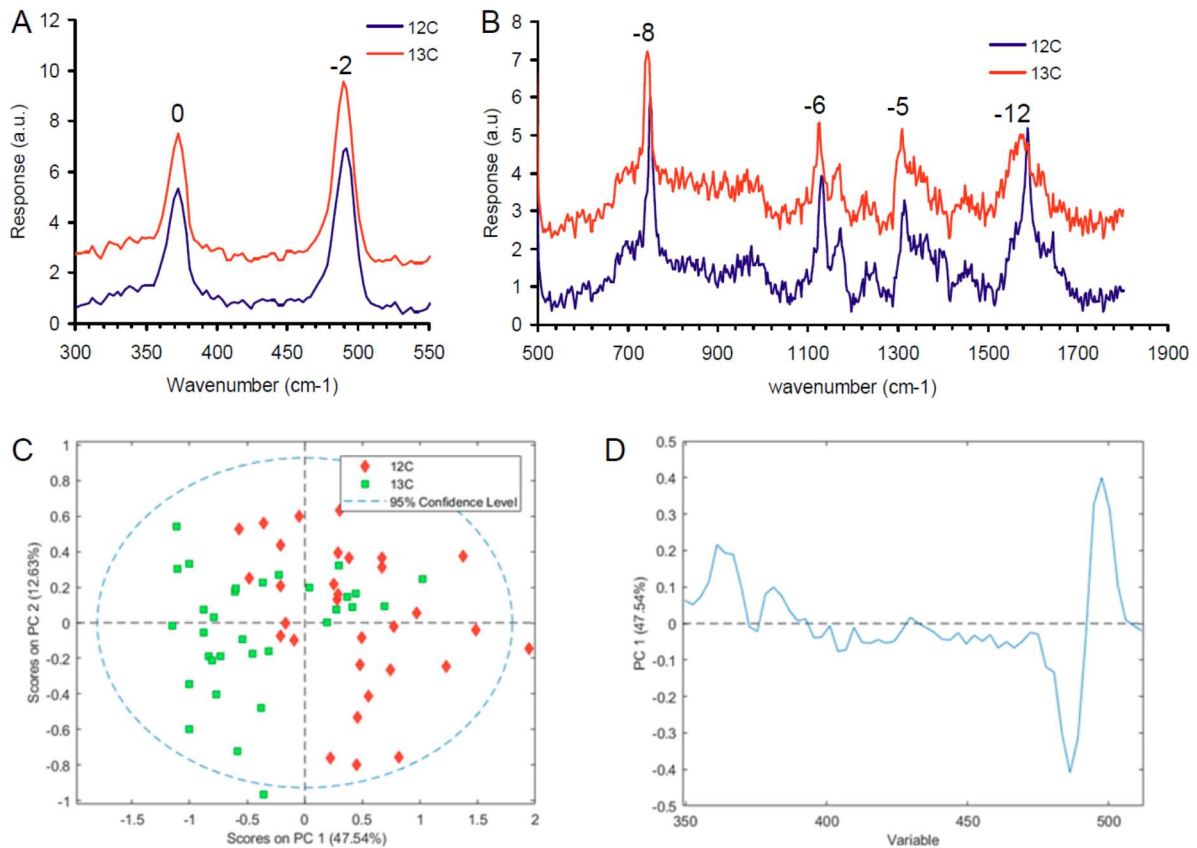

320

321 **Supplementary Figure 4.** Effect of  $^{13}\text{C}$  labelling on the green-laser Raman spectra from  
 322 intact cable bacteria. A) The low-frequency bands either do not shift ( $371\text{ cm}^{-1}$  band) or are  
 323 only slightly affected ( $491\text{ cm}^{-1}$  band shifts to  $489\text{ cm}^{-1}$ ) by the labelling. B) The characteristic  
 324 cytochrome bands clearly shift to lower values suggesting that cable bacteria filaments were  
 325 highly labelled with  $^{13}\text{C}$ . The average of  $N = 32$  spectra is shown for both unlabeled control  
 326 and  $^{13}\text{C}$  treatments and shifts in wavenumbers are indicated. C) PCA analysis of the 350 to  
 327  $550\text{ cm}^{-1}$  region of the spectra containing the low-frequency bands shows a difference  
 328 between the labelled versus unlabeled treatments. D) Variable (wavenumber) loadings on the  
 329 first PCA axis show that only the second lower band at  $492\text{ cm}^{-1}$  shifted slightly to lower  
 330 values in the labelled spectra.

331

332



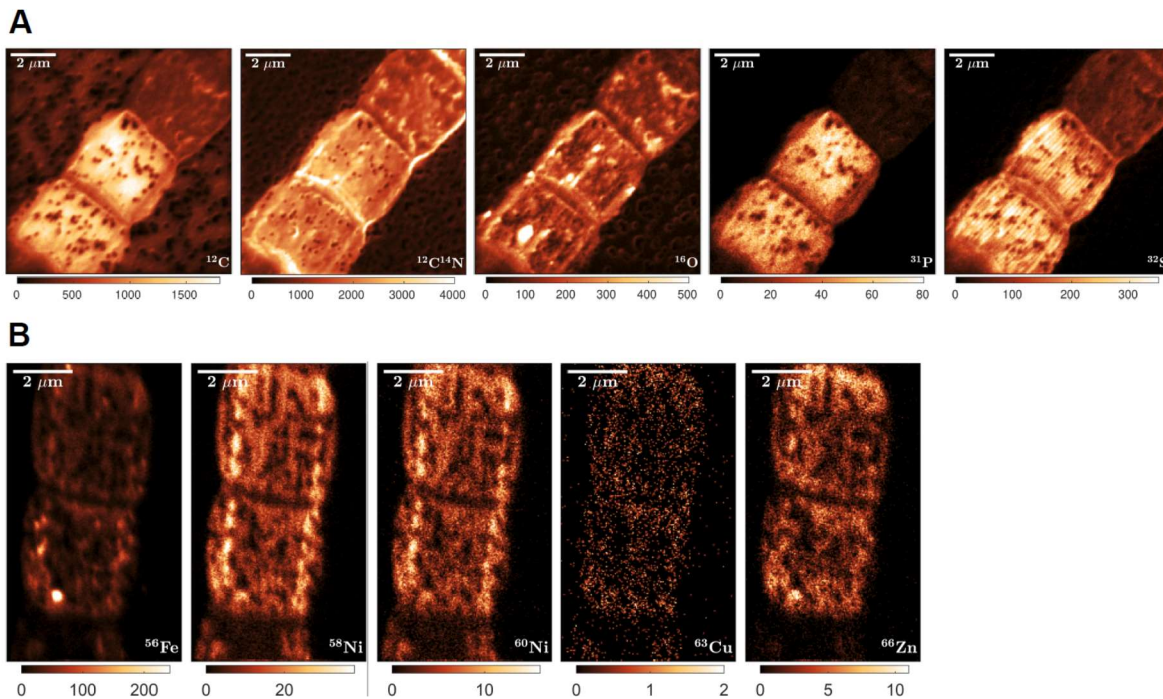

334

335 **Supplementary Figure 5.** NanoSIMS images of A) negative ions and B) positive ions of  
 336 metals from single fiber sheaths deposited on a gold-coated polycarbonate filter. In A) only  
 337 the first 100 planes of analysis were selected as this most clearly showed the fibers structure  
 338 in the  $^{32}\text{S}$  image. In B) the first 50 planes were selected as this showed the fibers most clearly  
 339 in the  $^{58}\text{Ni}$  image. Independent replica's (N = 2) yielded similar results.

340

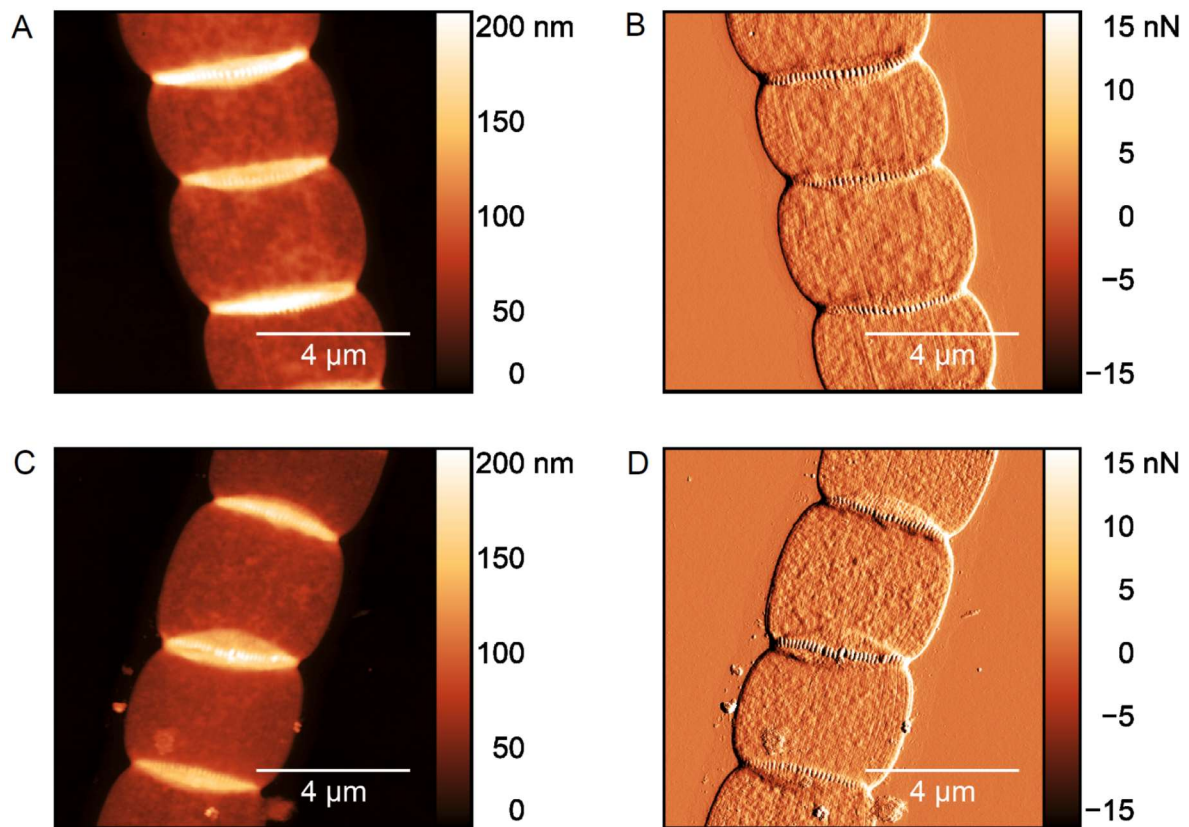

341

342 **Supplementary Figure 6.** Atomic Force Microscopy (AFM) images of fiber sheaths as  
 343 extracted with the standard protocol (A and B, SDS+1 mM EDTA for 10 min) and the high  
 344 EDTA treatment to remove Ni (C and D, SDS+50 mM EDTA for 10 min). Shown are the  
 345 height (A,C) and peak force error (B,D) data. The parallel fiber structures are retained after  
 346 high-concentration EDTA extraction. Independent replica's (N = 2) yielded similar results.

347

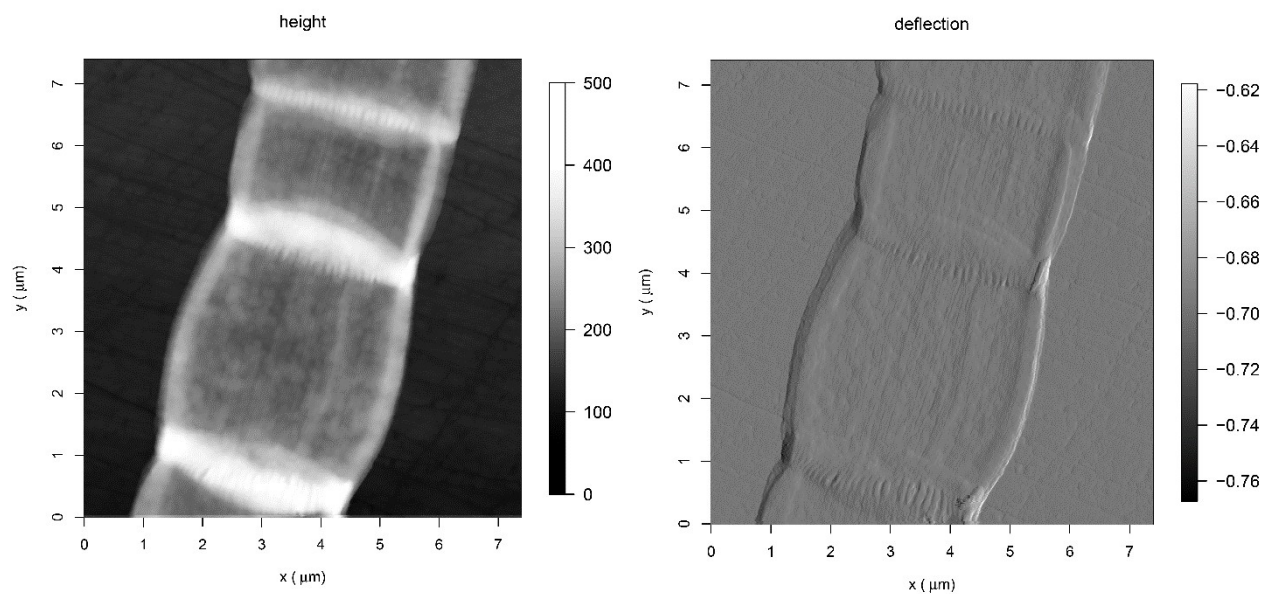

348

349 **Supplementary Figure 7.** AFM-IR height (in nm) and deflection maps of extracted fiber  
350 sheath showing the parallel fibers.

351

A

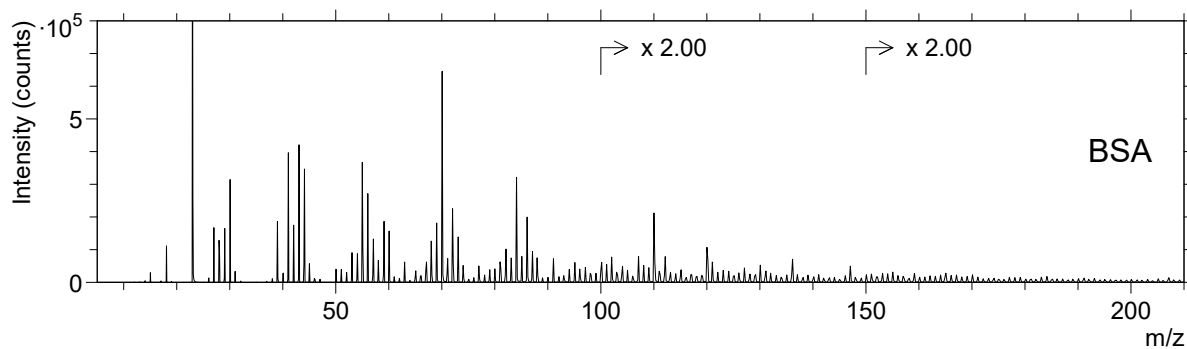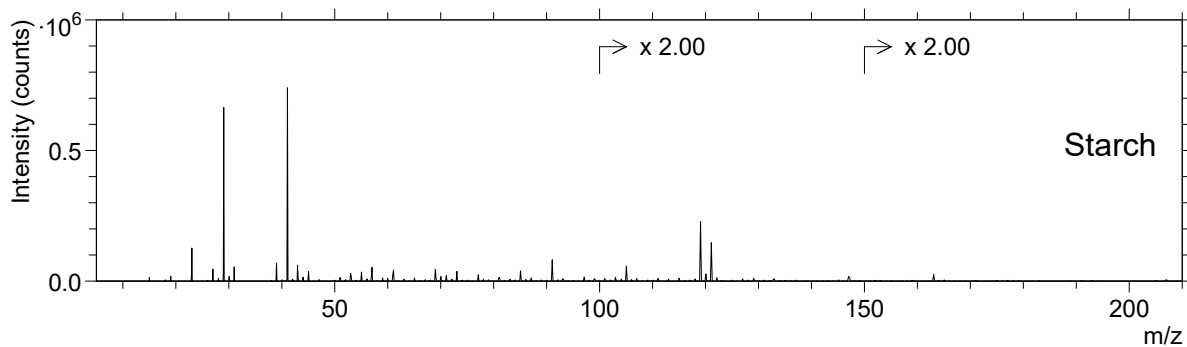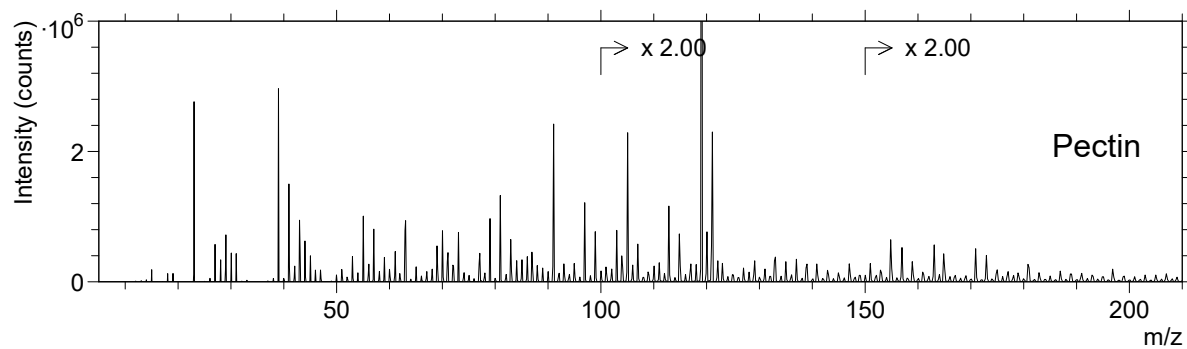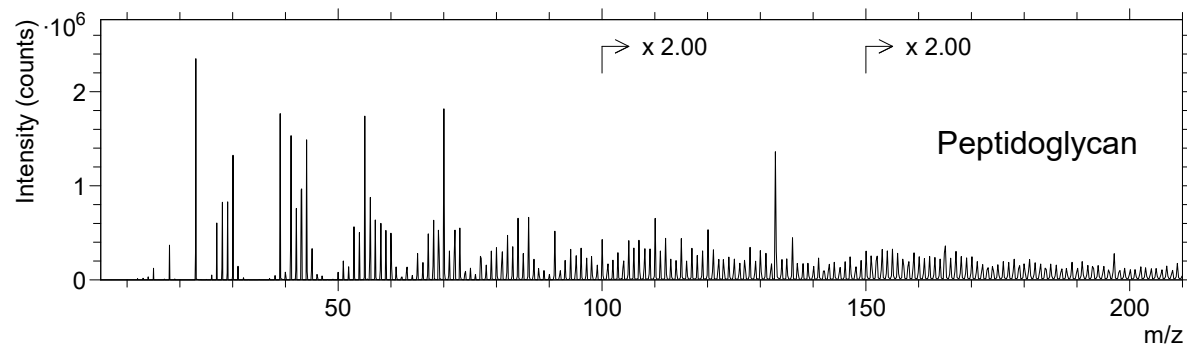

**B**

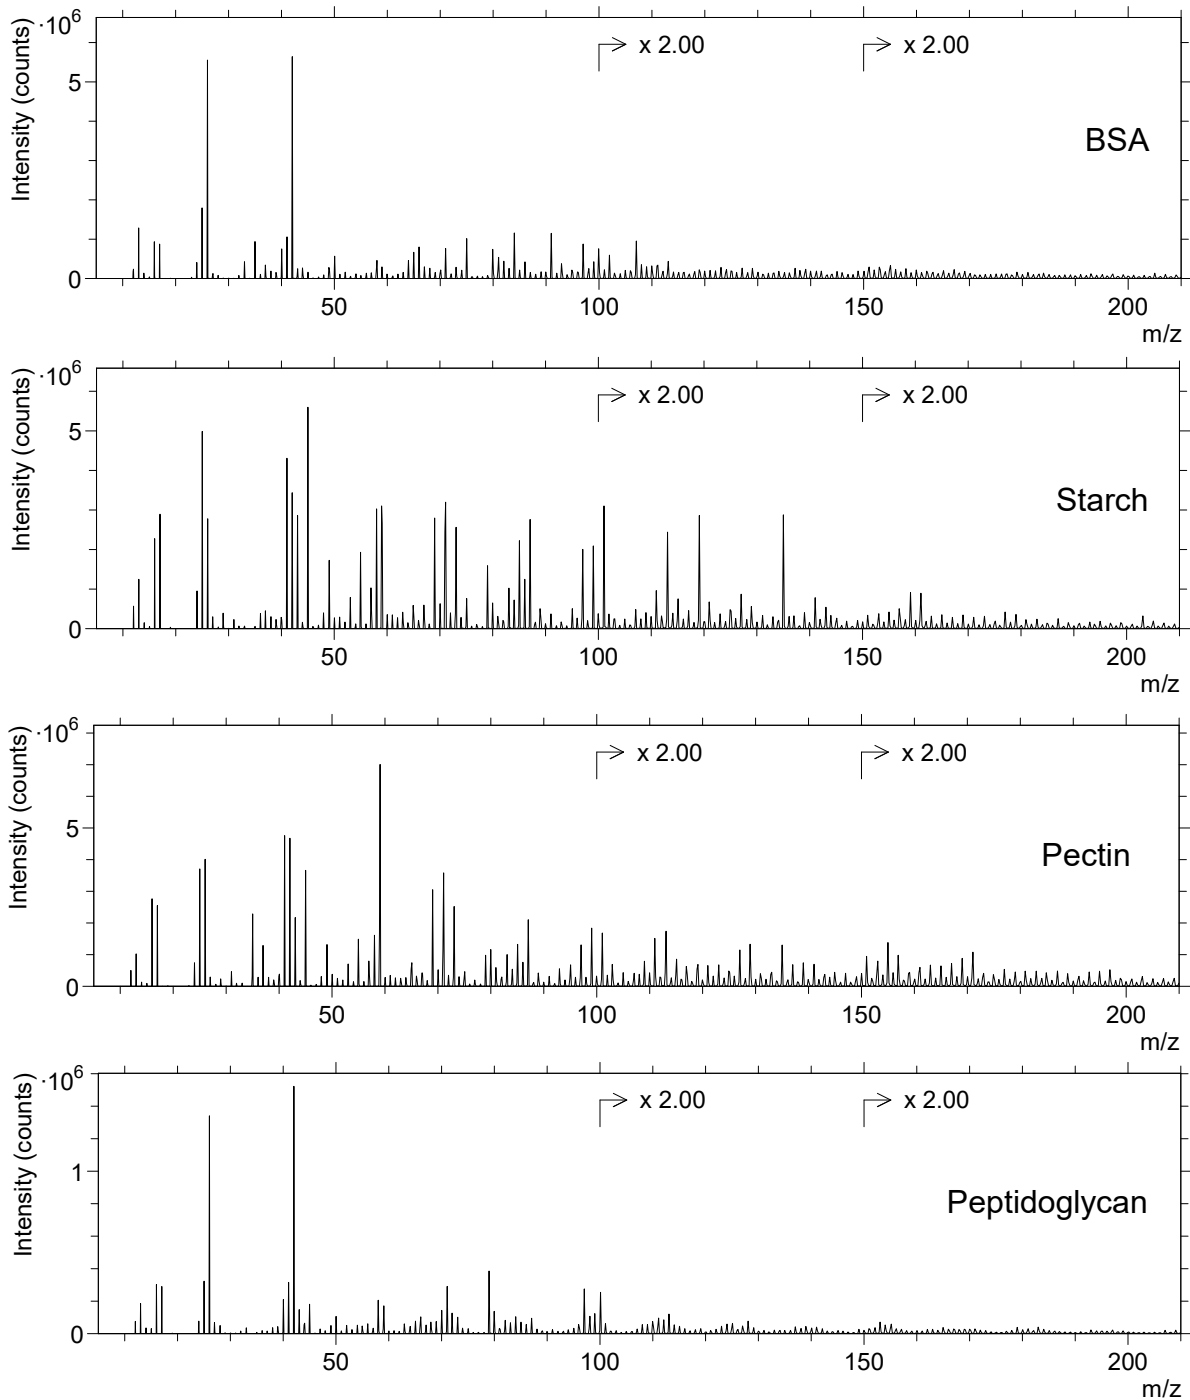

353

354 **Supplementary Figure 8.** ToF-SIMS positive (A) and negative (B) mode mass spectrum of  
355 additional protein and polysaccharide reference samples analyzed to aid in the interpretation  
356 of the fiber sheath mass spectra.

**A**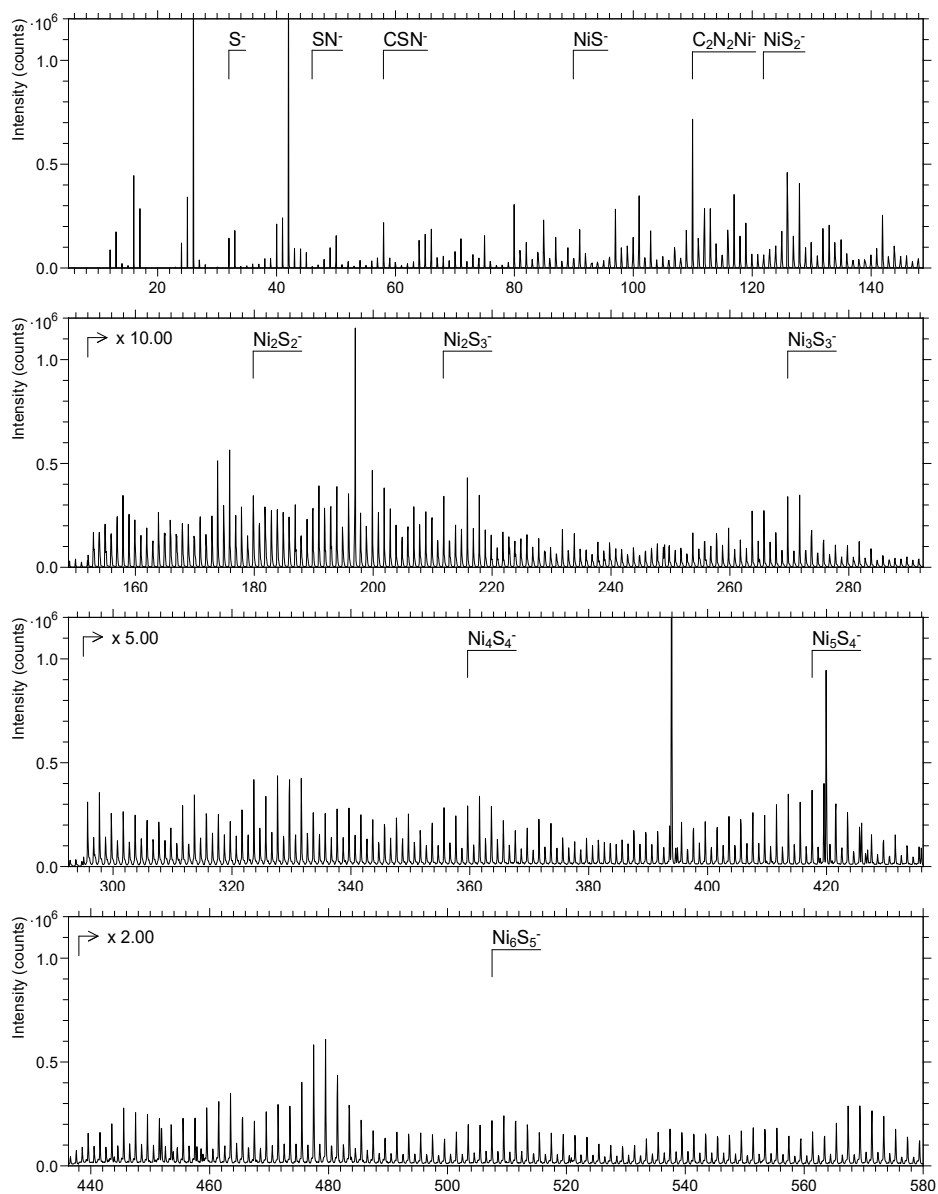

357

**B**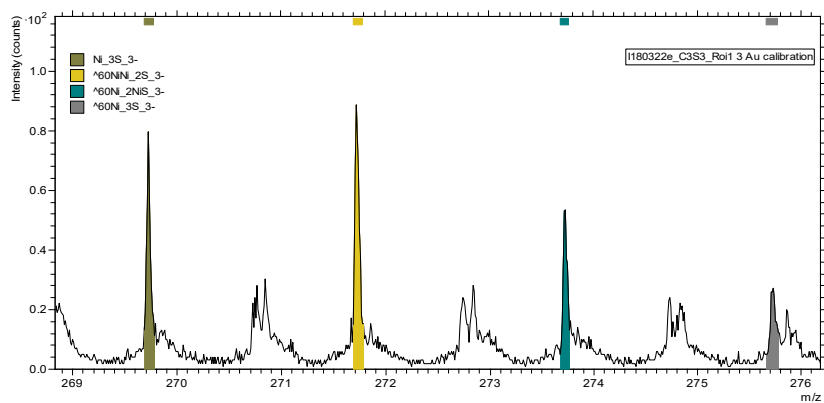

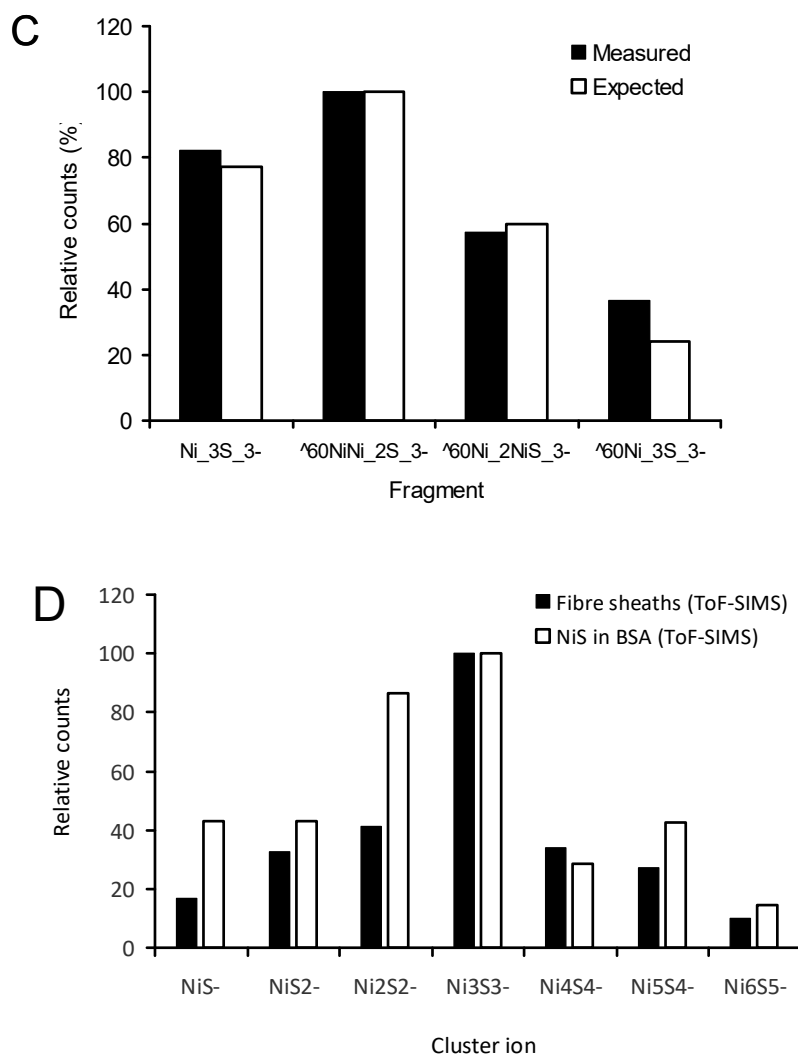

358

359 **Supplementary Figure 9.** ToF-SIMS negative mode Ni and S cluster ions from fiber sheaths  
 360 and a NiS/BSA mixture. A) ToF-SIMS negative mode mass spectrum of a mixture of NiS  
 361 mineral in BSA. Positions of a selection of important Ni and S cluster ions are indicated. B)  
 362 Distribution of Ni<sub>3</sub>S<sub>3</sub><sup>-</sup> isotopomers as a seen in the spectrum of fiber sheaths and C) compared  
 363 to the expected distribution showing the good fit (similar fits were found for the other Ni<sub>x</sub>S<sub>y</sub>-  
 364 clusters described, data not shown). D) Distribution of Ni<sub>x</sub>S<sub>y</sub>-cluster ions in fiber sheaths and  
 365 NiS/BSA mixture (counts were normalized to Ni<sub>3</sub>S<sub>3</sub><sup>-</sup>). Cluster ions with 3 or less Ni atoms  
 366 were sufficiently mass separated from fragments containing 2 oxygens instead of sulfur such  
 367 as Ni<sub>3</sub>S<sub>2</sub>O<sub>2</sub><sup>-</sup>.

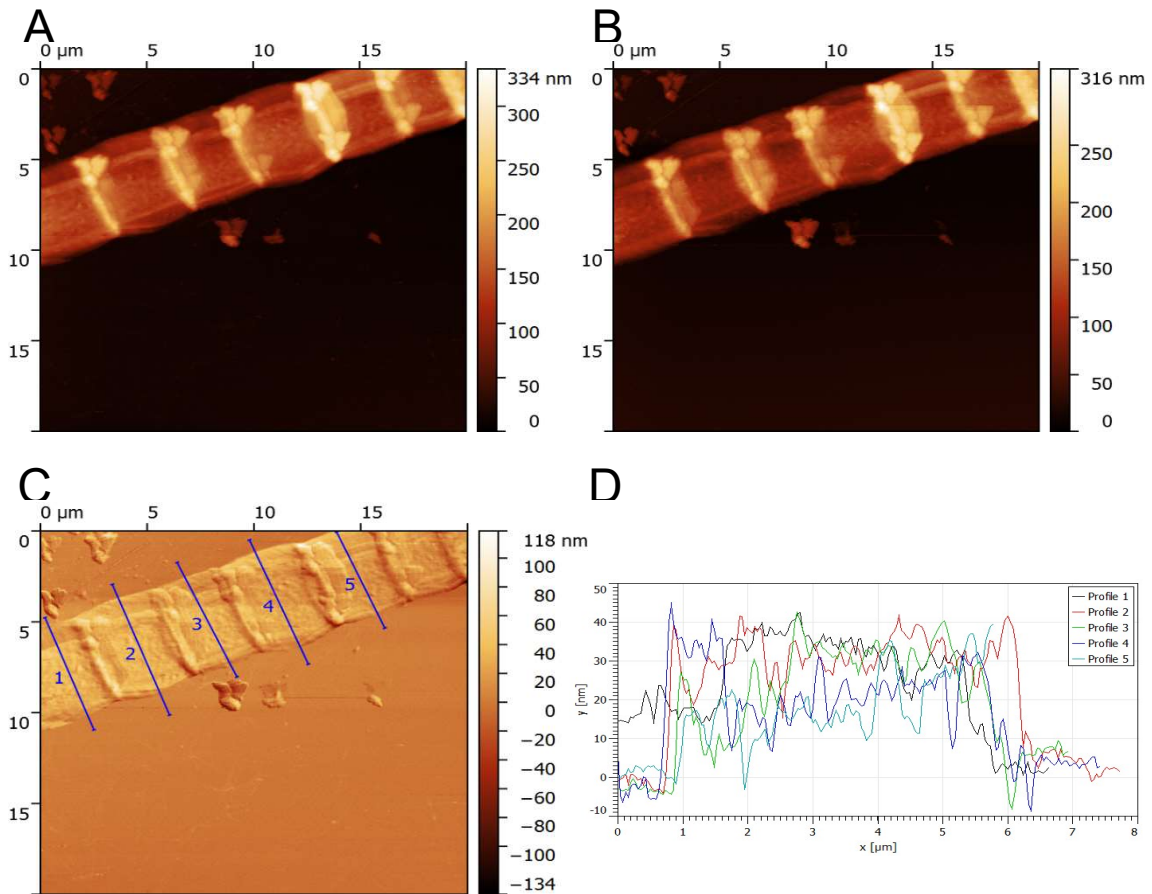

368

369 **Supplementary Figure 10.** Example of *in-situ* AFM calibration of ToF-SIMS sputtering  
 370 depth for fiber sheaths. AFM height map. A) mapping before ToF-SIMS analysis was started.  
 371 B) mapping after 57 sec of sputtering time (i.e. shortly after the peak in Ni<sup>+</sup> counts). C) The  
 372 differential image between (A) and (B) shows the amount of material removed after 57 sec  
 373 sputtering. Notice shading of the junctions with higher than average sputtering rates on the  
 374 side and lower than average sputtering rates on the opposite side. D) Height profiles as  
 375 indicated by the blue lines in panel (C) showing the lateral variation in sputtering depth.  
 376 Actual sputtering depths were calculated from height profiles as the average difference in  
 377 height of the fiber sheath (relative to the wafer surface) before and after sputtering (in this  
 378 example  $22.8 \pm 3.2$  nm).

379



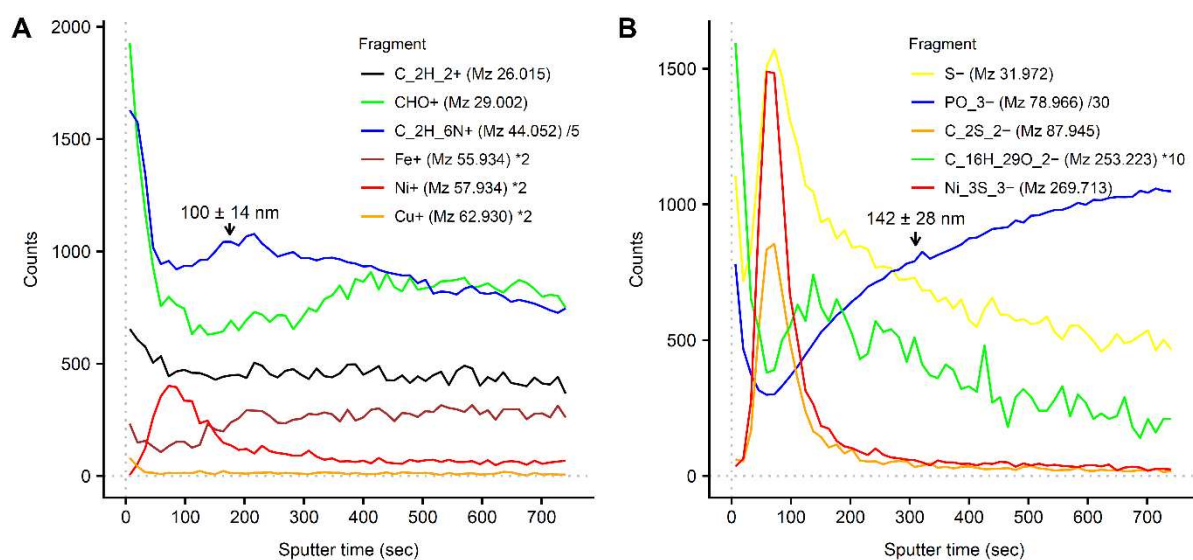

380

381 **Supplementary Figure 11.** ToF-SIMS depth profiles of intact cable bacteria demonstrate that

382 the Ni/S group is located in the periplasmic space. Representative ToF-SIMS depth profiles

383 from intact cable bacteria are shown in A) positive mode and B) negative mode. A selection

384 of fragments is shown representing the major biomolecule classes, and counts of individual

385 fragments were scaled to fit all data in a plot. Duplicate runs in both positive and negative

386 modes showed similar profiles. The counts from  $\text{Ni}_3\text{S}_3^-$  are the sum of all  $^{58}\text{Ni}$  and  $^{60}\text{Ni}$

387 isotopologues. The fatty acid fragment ( $\text{C}_{16}\text{H}_{29}\text{O}_2^-$ ) clearly shows two peaks with the first

388 peak at the surface coming most likely from the outer membrane and the broader secondary

389 peak from the cell membrane. Phosphate ( $\text{PO}_3^-$ ) also shows a first peak at the surface probably

390 coming from phospholipids and the secondary rise from phospholipids in the cell membrane

391 and poly-phosphate and nucleic acids in the cytoplasm. Arrows indicate sputtering depths as

392 determined with the in-situ AFM in the ToF-SIMS. Average sputtering rate was  $0.52 \pm 0.05$

393 nm/sec, which places the Ni and S containing peak at approximately 30-40 nm depth in

394 agreement with the expected position of the fibers in intact cable bacteria<sup>2</sup>.

395

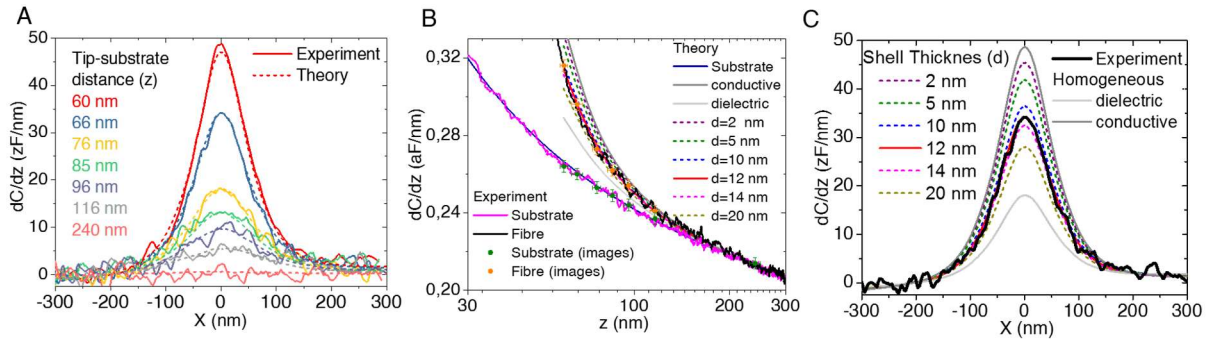

396

397 **Supplementary Figure 12.** Additional information on the SDM quantitative analysis shown  
 398 in Fig. 5 of the main text. A) Capacitance gradient cross-section profiles measured  
 399 (continuous lines) and calculated (dashed lines) at different tip-substrate distances. The  
 400 profiles for  $z=66$  nm are those displayed in Fig. 5 of the main text. The parameters used in the  
 401 calculations are the same as those of Fig. 5 of the main text:  $H=12.5$   $\mu\text{m}$ ,  $W=3$   $\mu\text{m}$ ,  $L=3$   $\mu\text{m}$ ,  
 402  $l=1$   $\mu\text{m}$ ,  $\theta=22$ ,  $R=54$  nm,  $z=60$  nm,  $h=42$  nm,  $w=87$  nm,  $d=12$  nm,  $l=1$   $\mu\text{m}$ ,  $\epsilon_s = \epsilon_c = 3$ ,  $\sigma_s = 0$   
 403 S/m and  $\sigma_c = 2 \cdot 10^3$  S/m. B) Capacitance gradient approach curves measured on a bare part of  
 404 the substrate (pink continuous line) and on the fiber (black continuous line). The continuous  
 405 dark blue and red lines correspond to the curves that best fit the experimental results from  
 406 where the tip geometry ( $R=54 \pm 1$  nm,  $\theta=22^\circ \pm 0.5^\circ$ ,  $C'_{\text{off}}=112.5 \pm 1.5$  zF/nm) and shell thickness  
 407 ( $d=12 \pm 2$  nm) have been extracted. The dashed lines represent calculated capacitance gradient  
 408 approach curves on the fiber for other values of the shell thickness. The continuous dark and  
 409 grey lines correspond to the homogeneous conductive and dielectric models, respectively. The  
 410 green and orange symbols correspond to the values measured on the bare substrate and fiber,  
 411 respectively, on the SDM images at different heights. These values have been used to set the  
 412 tip-substrate distances of the SDM images. C) Effect of the shell thickness on the calculated  
 413 capacitance gradient profiles for  $z=66$  nm. The meaning of the lines is the same as in B).

414

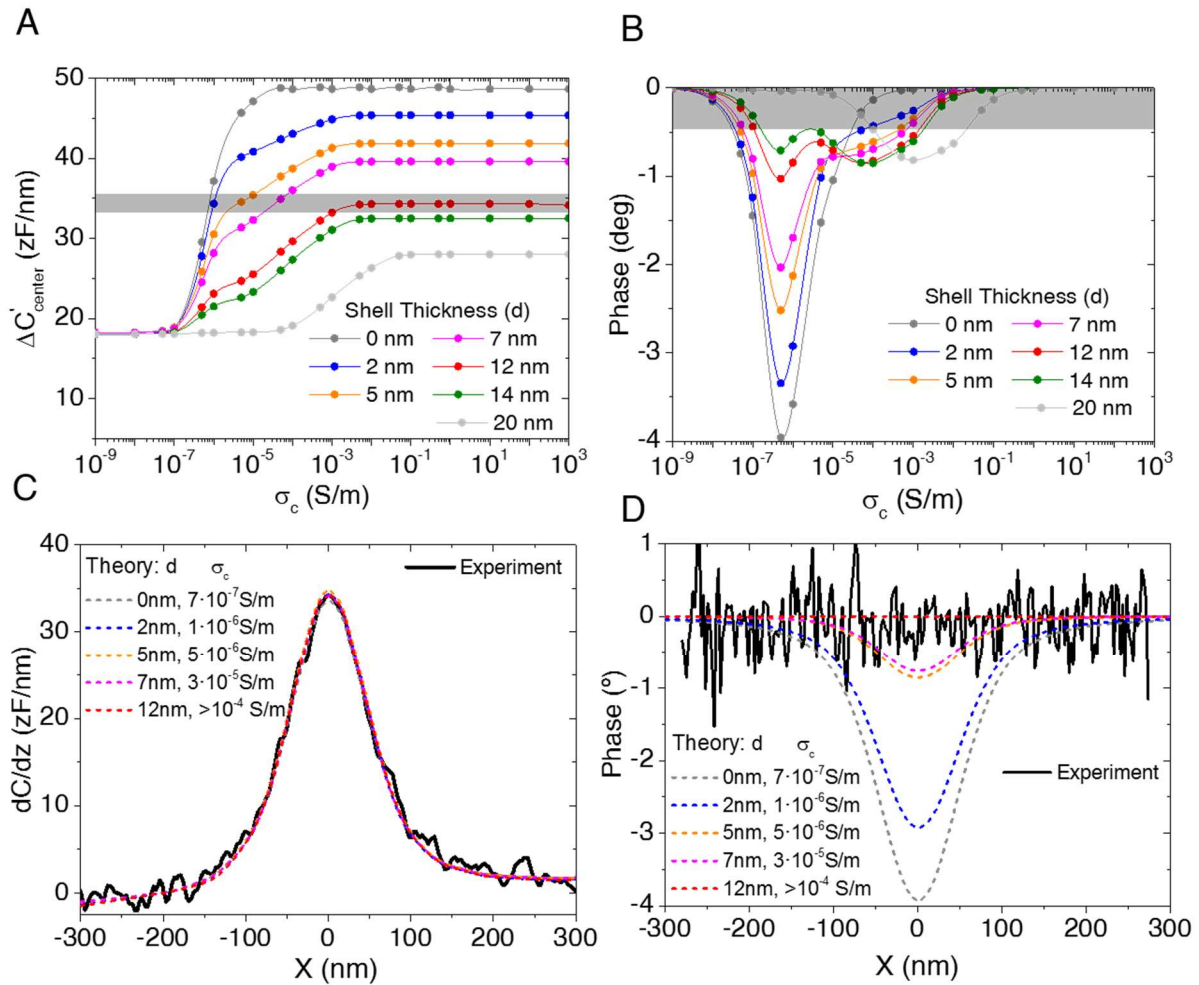

415

416 **Supplementary Figure 13.** Additional analysis of the core-shell conductive model used to  
 417 interpret the SDM measurements shown in Fig. 5 of the main text. A) Amplitude (in  
 418 capacitance gradient) and B) phase of the electric force contrast calculated for the cylindrical  
 419 fiber model as a function of the conductivity of the core for different values of the shell  
 420 thickness. The grey band corresponds to the experimental values extracted from the profiles  
 421 shown in Fig. 5 of the main text. Calculated capacitance gradient C) and phase D) profiles for  
 422 the couples of shell thickness-core conductivity that match the experimental measured  
 423 capacitance gradient contrast in A). The thick lines represent the experimental results (same  
 424 as in Fig. 5 of the main text). The parameters used in the calculations are the same as those of  
 425 Fig. 5 of the main text and of Supplementary Figure 12, when not otherwise stated.

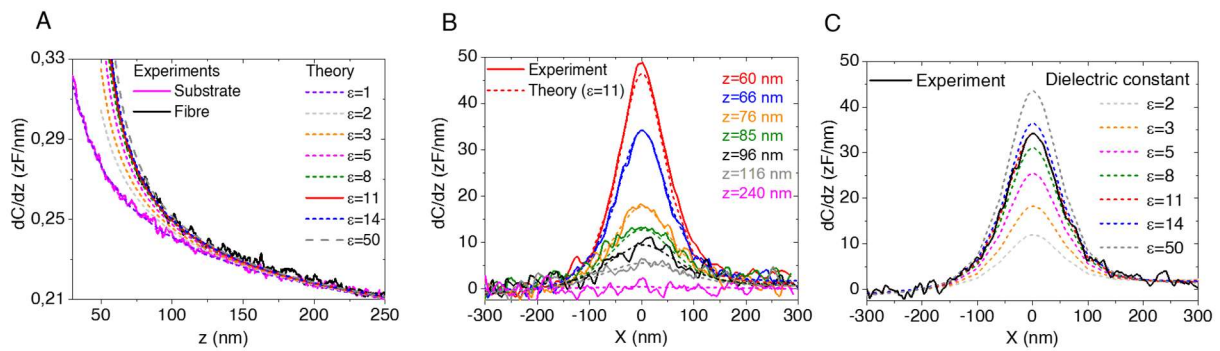

426

427 **Supplementary Figure 14.** Analysis of the SDM measurements shown in Fig. 5 of the main  
 428 text with a homogeneous cylinder dielectric model ( $\epsilon_s = \epsilon_c = \epsilon_{\text{eff}}$ ,  $\sigma_s = \sigma_c = 0$  S/m). A) Calculated  
 429 capacitance gradient approach curves on the fiber for different values of the equivalent  
 430 dielectric constant  $\epsilon_{\text{eff}}$  compared to the experimental measured curves on the substrate and  
 431 fiber (same as in Supplementary Fig 6B, thick lines). The best fit is obtained for  $\epsilon_{\text{eff}} = 11 \pm 3$ . B)  
 432 Calculated capacitance gradient profiles for  $\epsilon_{\text{eff}} = 11$  for different tip-substrate distances, and  
 433 comparison with the measured profiles (thick lines, same as in Supplementary Figure 6A). C)  
 434 Calculated capacitance gradient profiles for  $z = 66$  nm and different equivalent dielectric  
 435 constants  $\epsilon_{\text{eff}}$ , and comparison with the measured profile (thick line, same as in Fig. 5 of the  
 436 main text). The parameters used in the calculations are the same as those of Fig. 5 of the main  
 437 text and of Supplementary Figure 6, when not otherwise stated.

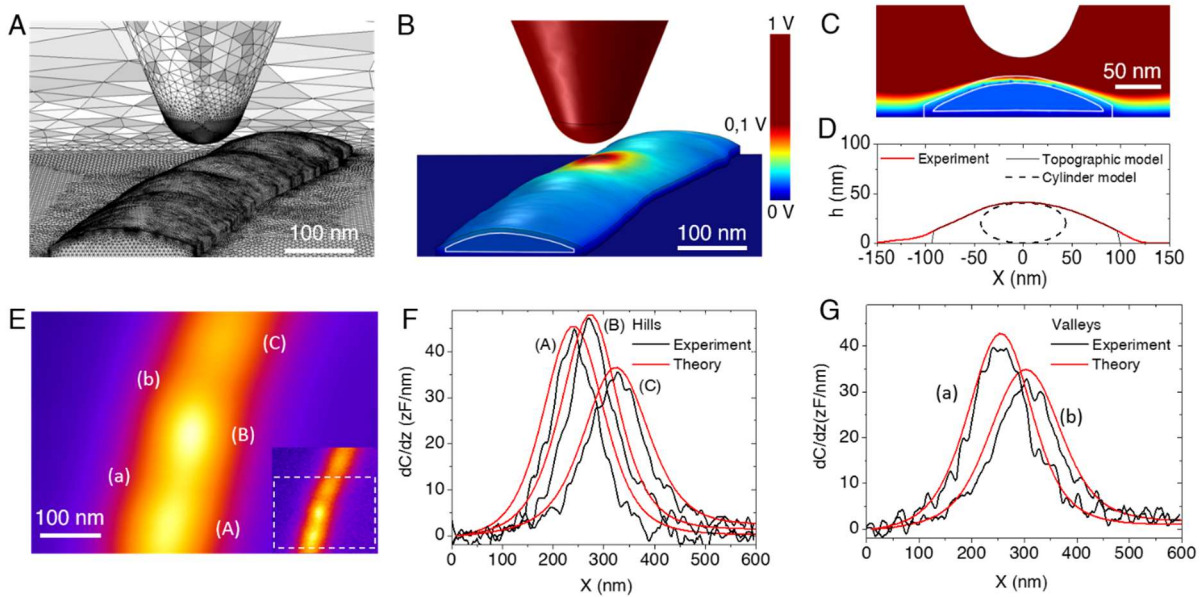

438 **Supplementary Figure 15.** Analysis of the SDM measurements shown in Fig. 5 of the main  
 439 text with a geometrical core-shell model reconstructed from the measured topography. A)  
 440 Detail of the geometry and mesh of the model generated from the measured topography of the  
 441 fiber (corresponding to the insert in Fig. 5B of the main text). The core-shell structure is  
 442 defined by assigning a sigmoidal behavior to the dielectric constant and conductivity with  
 443 plateau representing the shell and core values, respectively. The thickness of the shell  
 444 corresponds to the center of the sigmoid. B) Example of a calculated electric potential  
 445 distribution along the fiber for  $z=66$  nm,  $\epsilon_s = \epsilon_c = 3$ ,  $\sigma_s = 0$  S/m,  $\sigma_c = 2 \cdot 10^3$  S/m and  $d=10$  nm. The  
 446 tip parameters are the same as those in Fig. 5 of the main text. C) Example of a cross-section  
 447 electric potential distribution corresponding to B). D) Comparison of the cross-section of the  
 448 measured topography (red line), the topographically reconstructed fiber model (black  
 449 continuous line) and of the cylinder model (black dashed line). E) Calculated constant height  
 450 capacitance gradient SDM image by using the model in A) for the parameters in B). The  
 451 calculated image corresponds to the area enclosed by the dashed line in the insert. F) and G)  
 452 Comparison of the calculated capacitance gradient profiles (red lines) with the experimental  
 453 ones (black lines) on the hills (A,B,C) and valleys (a,b) indicated in E), respectively.



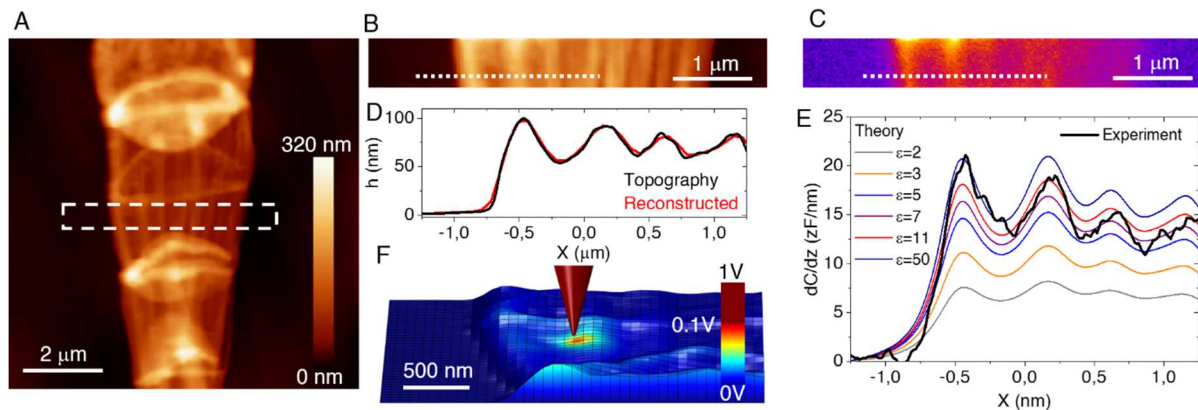

454

455 **Supplementary Figure 16.** SDM measurements and analysis on a fiber sheath. A) AFM  
 456 topographic image of the fiber sheath analyzed. B) and C) AFM topographic and SDM  
 457 constant height ( $z=155$  nm) images measured on the region enclosed by the dashed rectangle  
 458 in A). D) and E) Cross-section topographic and capacitance gradient profiles along the dashed  
 459 lines in B) and C) (thick black lines), respectively. The hills in the image correspond to  
 460 different fibers. F) Geometrical model reconstructed from the measured topography used in  
 461 the calculations, with an example of an electric potential distribution overlaid on it. The  
 462 electrical properties of the fiber sheath have been characterized by an equivalent  
 463 homogeneous dielectric constant,  $\epsilon_{\text{sheath}}$ . The tip geometry has been calibrated from a  
 464 capacitance gradient approach curve on the bare substrate giving  $R=26\pm 2$  nm,  $\theta=22\pm 3^\circ$ ,  
 465  $C'_{\text{offset}}=109\pm 3$  zF/nm. The theoretically predicted capacitance gradient profiles for this model  
 466 for different values of  $\epsilon_{\text{sheath}}$  are shown in E) (thin lines). Most of the hills (fibers) correspond  
 467 to  $\epsilon_{\text{sheath}}=7-11$  in good agreement with the equivalent dielectric constant value found on  
 468 isolated fibers ( $\epsilon_{\text{eff}}=7-11$ ). For the first hill a higher value is obtained, probably indicating that  
 469 two fibers are overlaid.

470

471 **Supplementary Table 1.** STEM-EDX element compositions for intact cable bacteria and  
 472 fiber sheaths. Data from two separate imaging sessions are shown (dates in first row).

473

| Elements<br>(atm%) | 04-05-17                          |       |                       |       | 08-08-17                          |       |                       |       |
|--------------------|-----------------------------------|-------|-----------------------|-------|-----------------------------------|-------|-----------------------|-------|
|                    | intact cable<br>bacteria<br>N = 3 |       | fiber sheath<br>N = 3 |       | intact cable<br>bacteria<br>N = 8 |       | fiber sheath<br>N = 7 |       |
|                    | AVG                               | SD    | AVG                   | SD    | AVG                               | SD    | AVG                   | SD    |
| Carbon             | 76.617                            | 2.382 | 73.013                | 0.508 | 82.233                            | 1.231 | 80.099                | 1.081 |
| Oxygen             | 14.370                            | 1.185 | 15.880                | 0.322 | 10.854                            | 1.394 | 11.319                | 1.205 |
| Nitrogen           | 6.133                             | 0.250 | 9.283                 | 0.224 | 5.411                             | 0.547 | 7.333                 | 0.477 |
| Phosphorus         | 1.120                             | 0.607 | 0.663                 | 0.100 | 0.833                             | 0.167 | 0.736                 | 0.150 |
| Sulphur*           | 0.510                             | 0.035 | 0.350                 | 0.225 | 0.483                             | 0.078 | 0.329                 | 0.023 |
| Zinc               | 0.210                             | 0.061 | 0.103                 | 0.015 | 0.145                             | 0.035 | 0.149                 | 0.040 |
| Iron               | 0.047                             | 0.006 | 0.023                 | 0.006 | 0.033                             | 0.007 | 0.013                 | 0.005 |
| Nickel             | 0.009                             | 0.001 | 0.037                 | 0.006 | 0.009                             | 0.004 | 0.016                 | 0.005 |
| Copper             | 0.009                             | 0.004 | 0.010                 | 0.009 | 0.006                             | 0.005 | 0.007                 | 0.005 |

474

475 \*: Sulphur showed interference from a Molybdenum impurity derived most likely from the  
 476 TEM grid and is therefore uncertain.

477

478 **Supplementary references**

479

- 480 1. Burdorf, L. D. W. *et al.* Long-distance electron transport occurs globally in marine  
481 sediments. *Biogeosciences* **14**, 683–701 (2017).
- 482 2. Cornelissen, R. *et al.* The cell envelope structure of cable bacteria. *Front. Microbiol.* **9**,  
483 (2018).
- 484 3. Bjerg, J. T. *et al.* Long-distance electron transport in individual, living cable bacteria.  
485 *Proc. Natl. Acad. Sci.* **115**, 5786–5791 (2018).
- 486 4. Eilers, P. H. C. & Boelens, H. F. M. Baseline correction with asymmetric least squares  
487 smoothing. *Leiden University Medical Centre Report.* (2005).
- 488 5. Fumagalli, L., Esteban-Ferrer, D., Cuervo, A., Carrascosa, J. L. & Gomila, G. Label-free  
489 identification of single dielectric nanoparticles and viruses with ultraweak polarization  
490 forces. *Nat. Mater.* **11**, 808–816 (2012).
- 491 6. Lozano, H. *et al.* Dielectric constant of flagellin proteins measured by scanning dielectric  
492 microscopy. *Nanoscale* **10**, 19188–19194 (2018).
- 493 7. Lozano, H., Millán-Solsona, R., Fabregas, R. & Gomila, G. Sizing single nanoscale  
494 objects from polarization forces. *Sci. Rep.* **9**, 1–12 (2019).
- 495 8. Wang, D. *et al.* Interplay between spherical confinement and particle shape on the self-  
496 assembly of rounded cubes. *Nat. Commun.* **9**, 2228 (2018).
- 497 9. van Aarle, W. *et al.* The ASTRA toolbox: A platform for advanced algorithm  
498 development in electron tomography. *Ultramicroscopy* **157**, 35–47 (2015).
- 499 10. Gianoncelli, A., Kourousias, G., Merolle, L., Altissimo, M. & Bianco, A. Current status  
500 of the TwinMic beamline at Elettra: A soft X-ray transmission and emission microscopy  
501 station. *J. Synchrotron Radiat.* **23**, 1526–1537 (2016).



- 502 11. Solé, V. A., Papillon, E., Cotte, M., Walter, Ph. & Susini, J. A multiplatform code for the  
503 analysis of energy-dispersive X-ray fluorescence spectra. *Spectrochim. Acta Part B At.*  
504 *Spectrosc.* **62**, 63–68 (2007).
- 505 12. Polerecky, L. *et al.* Look@NanoSIMS - a tool for the analysis of nanoSIMS data in  
506 environmental microbiology. *Environ. Microbiol.* **14**, 1009–1023 (2012).
- 507 13. Meysman, F. J. R. *et al.* A highly conductive fibre network enables centimetre-scale  
508 electron transport in multicellular cable bacteria. *Nat. Commun.* **10**, 1–8 (2019).
- 509 14. Baugh, L. *et al.* Probing the orientation of surface-immobilized protein G B1 using ToF-  
510 SIMS, sum frequency generation, and NEXAFS spectroscopy. *Langmuir* **26**, 16434–  
511 16441 (2010).
- 512 15. Goacher, R. E., Jeremic, D. & Master, E. R. Expanding the library of secondary ions that  
513 distinguish lignin and polysaccharides in time-of-flight secondary ion mass spectrometry  
514 analysis of wood. *Anal. Chem.* **83**, 804–812 (2011).
- 515 16. Wei, W. *et al.* Characterization of syntrophic Geobacter communities using ToF-SIMS.  
516 *Biointerphases* **12**, 05G601 (2017).
- 517 17. Lebec, V., Boujday, S., Poleunis, C., Pradier, C.-M. & Delcorte, A. Time-of-flight  
518 secondary ion mass spectrometry investigation of the orientation of adsorbed antibodies  
519 on SAMs correlated to biorecognition tests. *J. Phys. Chem. C* **118**, 2085–2092 (2014).
- 520 18. Ding, Y. *et al.* In Situ Molecular Imaging of the Biofilm and Its Matrix. *Anal. Chem.* **88**,  
521 11244–11252 (2016).
- 522 19. Lee, C.-Y., Harbers, G. M., Grainger, D. W., Gamble, L. J. & Castner, D. G.  
523 Fluorescence, XPS, and TOF-SIMS Surface Chemical State Image Analysis of DNA  
524 Microarrays. *J. Am. Chem. Soc.* **129**, 9429–9438 (2007).

- 525 20. May, C. J., Canavan, H. E. & Castner, D. G. Quantitative X-ray Photoelectron  
526 Spectroscopy and Time-of-Flight Secondary Ion Mass Spectrometry Characterization of  
527 the Components in DNA. *Anal. Chem.* **76**, 1114–1122 (2004).
- 528 21. Lovering, A. L., Safadi, S. S. & Strynadka, N. C. J. Structural perspective of  
529 peptidoglycan biosynthesis and assembly. *Annu. Rev. Biochem.* **81**, 451–478 (2012).
- 530 22. Geerlings, N. M. J., Zetsche, E.-M., Hidalgo Martinez, S., Middelburg, J. J. & Meysman,  
531 F. J. R. Mineral formation induced by cable bacteria performing long-distance electron  
532 transport in marine sediments. *Biogeosciences Discuss.* 1–35 (2018) doi:10.5194/bg-  
533 2018-444.
- 534 23. Franquet, A. *et al.* Self focusing SIMS: Probing thin film composition in very confined  
535 volumes. *Appl. Surf. Sci.* **365**, 143–152 (2016).
- 536 24. Feld, H., Rading, D., Leute, A. & Benninghoven, A. Comparative investigations of the  
537 secondary ion emission of metal complexes under MeV and keV ion bombardment. *Org.*  
538 *Mass Spectrom.* **28**, 841–852 (1993).
- 539 25. El Nakat, J. H., Dance, I. G., Fisher, K. J., Rice, D. & Willett, G. D. Laser-ablation  
540 FTICR (Fourier-transform ICR) mass spectrometry of metal sulfides: gaseous anionic  
541 nickel-sulfur [NixSy] clusters. *J. Am. Chem. Soc.* **113**, 5141–5148 (1991).
- 542 26. Jones, T. B. *Electromechanics of particles*. (Cambridge University Press, 1995).
- 543 27. Cuervo, A. *et al.* Direct measurement of the dielectric polarization properties of DNA.  
544 *Proc. Natl. Acad. Sci.* **111**, E3624–E3630 (2014).
- 545 28. Dols-Perez, A., Gramse, G., Calò, A., Gomila, G. & Fumagalli, L. Nanoscale electric  
546 polarizability of ultrathin bilayers on insulating substrates by electrostatic force  
547 microscopy. *Nanoscale* **7**, 18327–18336 (2015).
- 548 29. Checa, M. *et al.* Mapping the dielectric constant of a single bacterial cell at the nanoscale  
549 with scanning dielectric force volume microscopy. *Nanoscale* **11**, 20809–20819 (2019).

- 550 30. Fabregas, R. & Gomila, G. Dielectric nanotomography based on electrostatic force  
551 microscopy: A numerical analysis. *J. Appl. Phys.* **127**, 024301 (2020).
- 552 31. Gray, H. B. & Winkler, J. R. Electron flow through metalloproteins. *Biochim. Biophys.*  
553 *Acta BBA - Bioenerg.* **1797**, 1563–1572 (2010).
- 554 32. Fischer, H., Polikarpov, I. & Craievich, A. F. Average protein density is a molecular-  
555 weight-dependent function. *Protein Sci.* **13**, 2825–2828 (2004).
- 556
