# Supplementary material for: Efficient long-range conduction in cable bacteria through nickel protein wires
Source: PubMed Central journal article supplement (PMC8238962; doi:10.1038/s41467-021-24312-4), 2021-06-28
Supplement: 41467_2021_24312_MOESM3_ESM.pdf [file 41467_2021_24312_MOESM3_ESM.pdf]

## **Description of Additional Supplementary Files**

File Name: Supplementary Data 1

Description: Identified fragment ions in positive mode ToF-SIMS of fiber sheaths extracted from cable bacteria.

File Name: Supplementary Data 2

Description: Identified fragment ions in negative mode ToF-SIMS of fiber sheaths extracted from cable bacteria.

File Name: Supplementary Movie 1

Description: 3D tomographic reconstruction of the freeze dried fiber sheath in Fig. 1A
